# Supplementary material for: Frequency and Distribution of Refractive Error in Adult Life: Methodology and Findings of the UK Biobank Study
Source: PubMed Central journal article supplement (PMC4591976; doi:10.1371/journal.pone.0139780), 2015-10-02

**S1 Fig. Flowchart of participation**

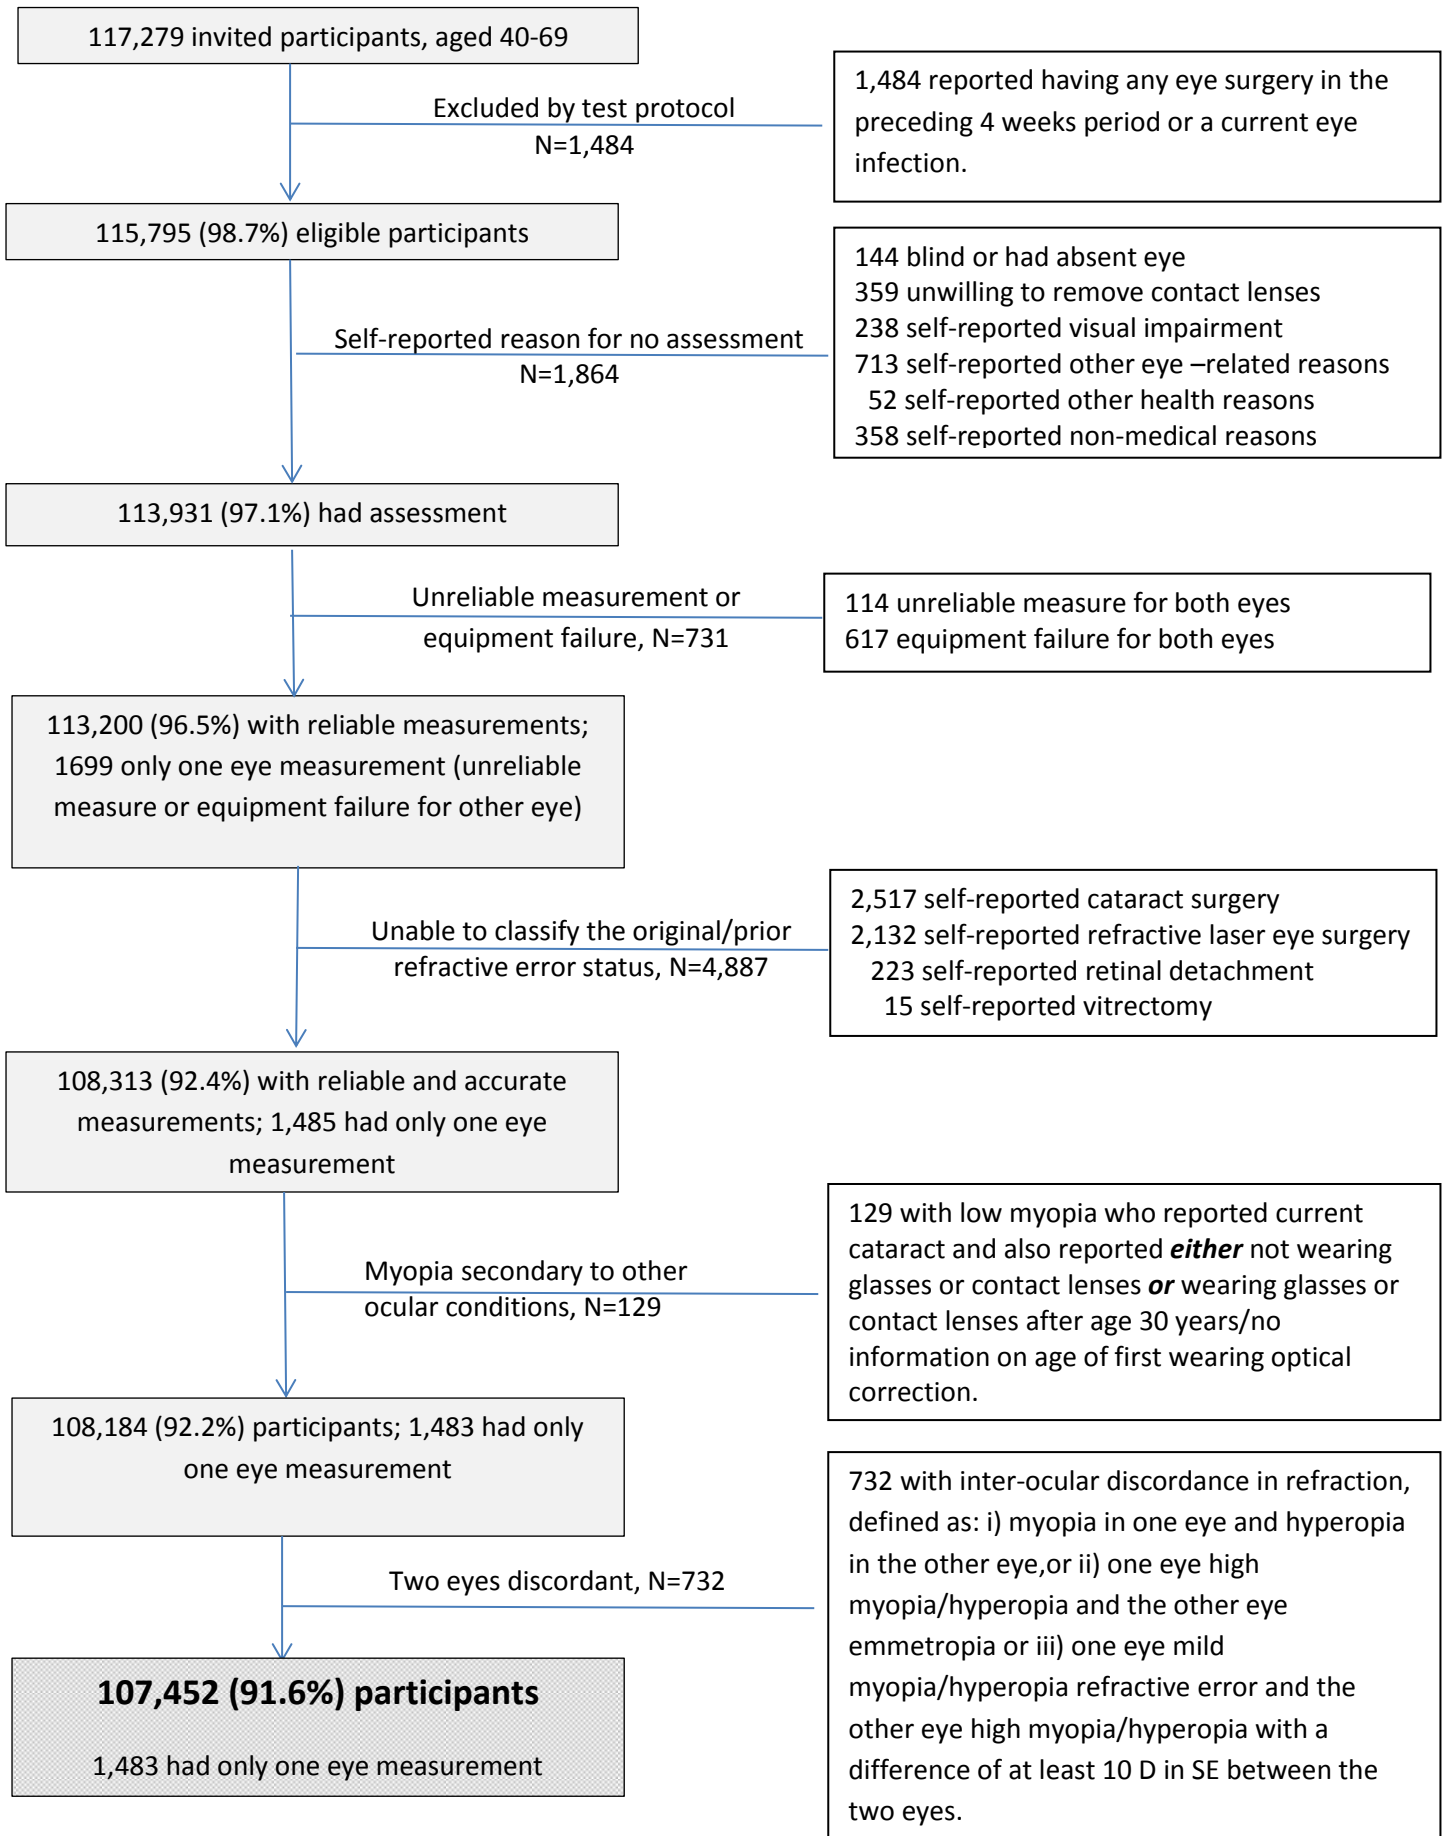

Supplement: pone.0139780.s001.pdf [file pone.0139780.s001.pdf]
