# Supplementary material for: Frequency and Distribution of Refractive Error in Adult Life: Methodology and Findings of the UK Biobank Study
Source: PubMed Central journal article supplement (PMC4591976; doi:10.1371/journal.pone.0139780), 2015-10-02
Supplement: pone.0139780.s002.pdf [file pone.0139780.s002.pdf]

**S1 Table. Comparison of subjects included in or excluded from analyses**

|                                     | Included in frequency analysis<br>N=107,452 | Excluded from frequency analysis **<br>N=9827 | P value | Excluded from analysis of associations<br>N=9095 |
|-------------------------------------|---------------------------------------------|-----------------------------------------------|---------|--------------------------------------------------|
|                                     | n (%)                                       | n (%)                                         |         | n (%)                                            |
| Age band                            |                                             |                                               | <0.001  |                                                  |
| 40-49                               | 24,782 (23.1%)                              | 1802 (18.3%)                                  |         | 1668 (18.3%)                                     |
| 50-59                               | 34,853 (32.4%)                              | 2694 (27.4%)                                  |         | 2478 (27.3%)                                     |
| 60-69                               | 47,817 (44.5%)                              | 5331 (54.3%)                                  |         | 4949 (54.4%)                                     |
| Gender                              |                                             |                                               | 0.633   |                                                  |
| Male                                | 49,000 (45.6%)                              | 4443 (45.2%)                                  |         | 4109 (45.2%)                                     |
| Female                              | 58,452 (54.4%)                              | 5384 (54.8%)                                  |         | 4986 (54.8%)                                     |
| Highest educational qualification * |                                             |                                               | <0.001  |                                                  |
| No qualification                    | 15,776 (14.9%)                              | 1609 (16.7%)                                  |         | 1521 (17.2%)                                     |
| O level                             | 28,275 (26.7%)                              | 2479 (25.8%)                                  |         | 2296 (25.8%)                                     |
| A level                             | 19,162 (18.1%)                              | 1698 (17.7%)                                  |         | 1566 (17.6%)                                     |
| Higher level                        | 42,773 (40.4%)                              | 3833 (39.9%)                                  |         | 3511 (39.4%)                                     |
| Unknown                             | 1466 (-)                                    | 208 (-)                                       |         | 201 (-)                                          |
| Accommodation tenure                |                                             |                                               | <0.001  |                                                  |
| Rent from council                   | 7301 (6.9%)                                 | 782 (8.2%)                                    |         | 732 (8.3%)                                       |
| Rent from private                   | 4351 (4.1%)                                 | 380 (4.0%)                                    |         | 354 (4.0%)                                       |
| Own with mortgage                   | 37,858 (35.9%)                              | 3035 (31.7%)                                  |         | 2808 (31.7%)                                     |
| Own                                 | 55,840 (53.0%)                              | 5376 (56.2%)                                  |         | 4964 (56.0%)                                     |
| Unknown                             | 2102 (-)                                    | 254 (-)                                       |         | 237 (-)                                          |
| Ethnicity                           |                                             |                                               | <0.001  |                                                  |
| White                               | 95,791 (89.8%)                              | 8482 (87.4%)                                  |         | 7826 (87.2%)                                     |
| Mixed                               | 974 (0.9%)                                  | 90 (0.9%)                                     |         | 82 (0.9%)                                        |
| Asian/Asian British                 | 4032 (3.8%)                                 | 494 (5.1%)                                    |         | 466 (5.2%)                                       |
| Black/Black British                 | 3759 (3.5%)                                 | 400 (4.1%)                                    |         | 378 (4.2%)                                       |
| Chinese                             | 490 (0.5%)                                  | 47 (0.5%)                                     |         | 46 (0.5%)                                        |
| Other                               | 1627 (1.5%)                                 | 192 (2.0%)                                    |         | 181 (2.0%)                                       |
| Unknown                             | 779 (-)                                     | 122 (-)                                       |         | 116 (-)                                          |

\* No qualifications, State school examinations at 16 years of age ('O' levels), at 18 years ('A' levels) or University/other professional qualification

\*\*additional exclusion of those with discordant refractive errors in right/left eyes
